# Supplementary material for: Octamer-dependent transcription in T cells is mediated by NFAT and NF-κB
Source: PubMed Central journal article supplement — Nucleic Acids Res. 2013 Jan 3;41(4):2138–54. doi: 10.1093/nar/gks1349 (PMC3575799; doi:10.1093/nar/gks1349), 2013-01-03
Supplement: supp_gks1349_nar-01538-x-2012-File011.pdf [file supp_gks1349_nar-01538-x-2012-File011.pdf]

Supplementary Figure 1

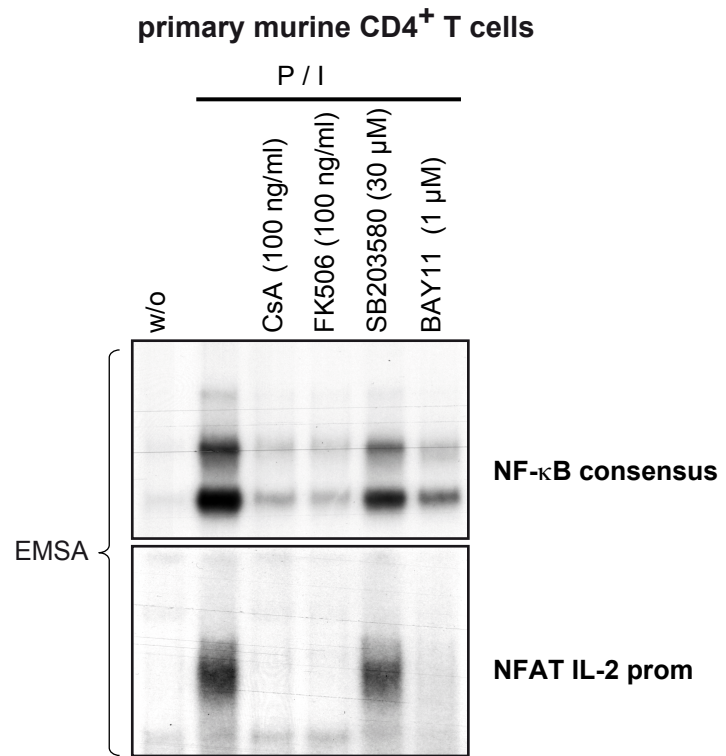

CD4<sup>+</sup> T cells

NF- $\kappa$ B consensus site

NFAT  
IL-2 promoter

NFAT  
BOB.1 promoter

NFAT/NF- $\kappa$ B  
composite site  
BOB.1 promoter

NFAT/NF- $\kappa$ B  
consecutive site  
BOB.1 promoter

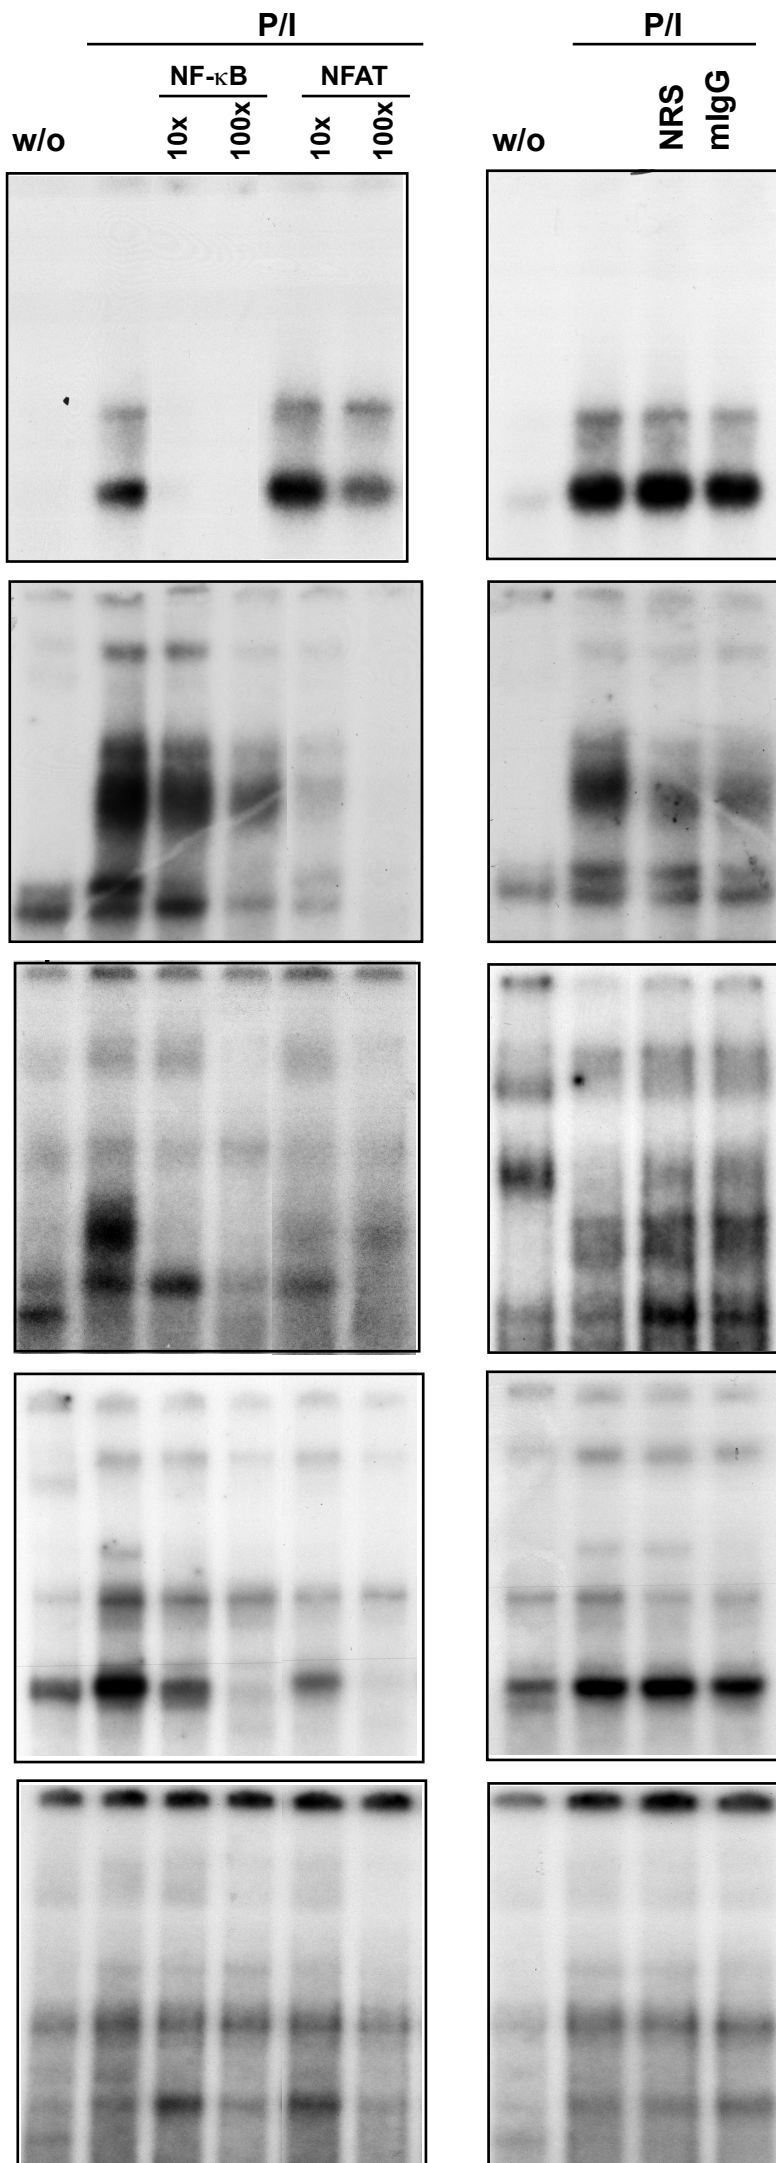

Supplementary Figure 3

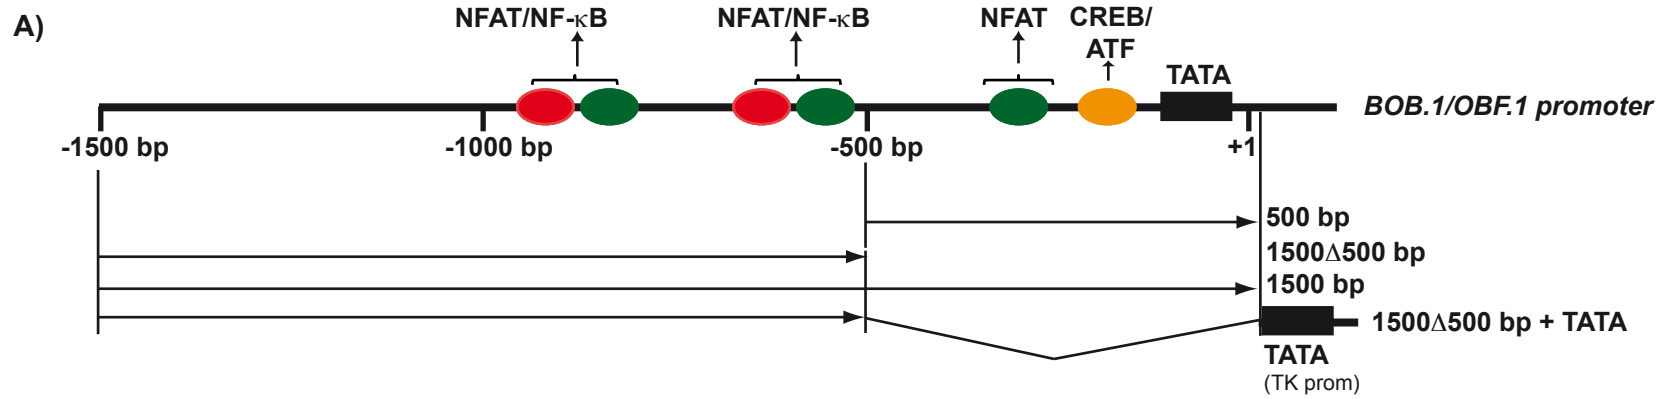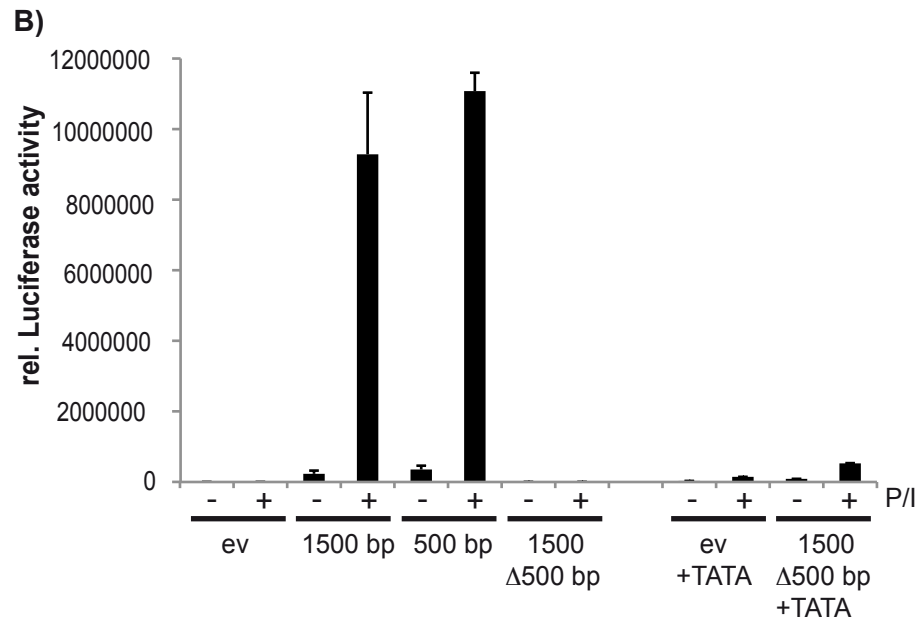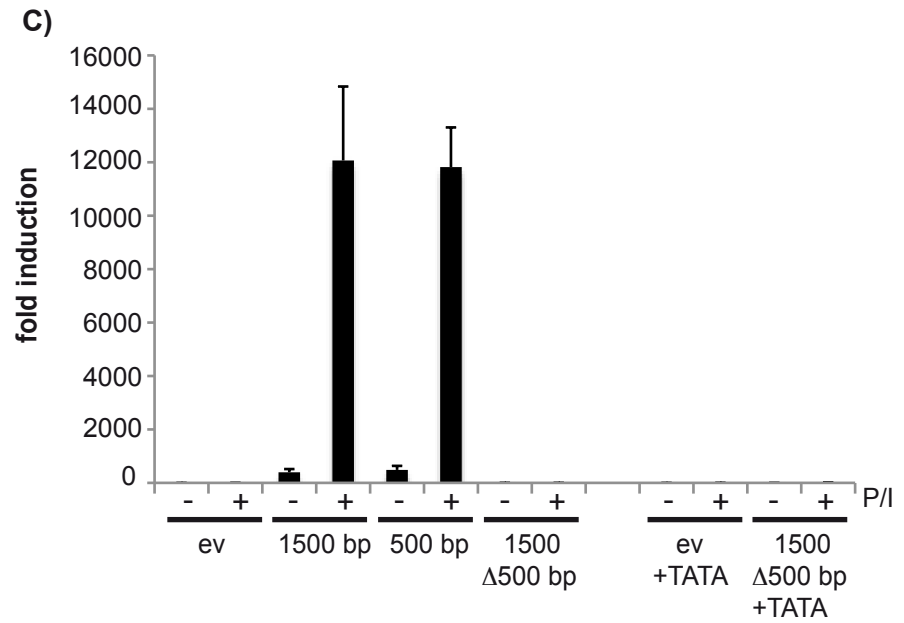

Supplementary Figure 4

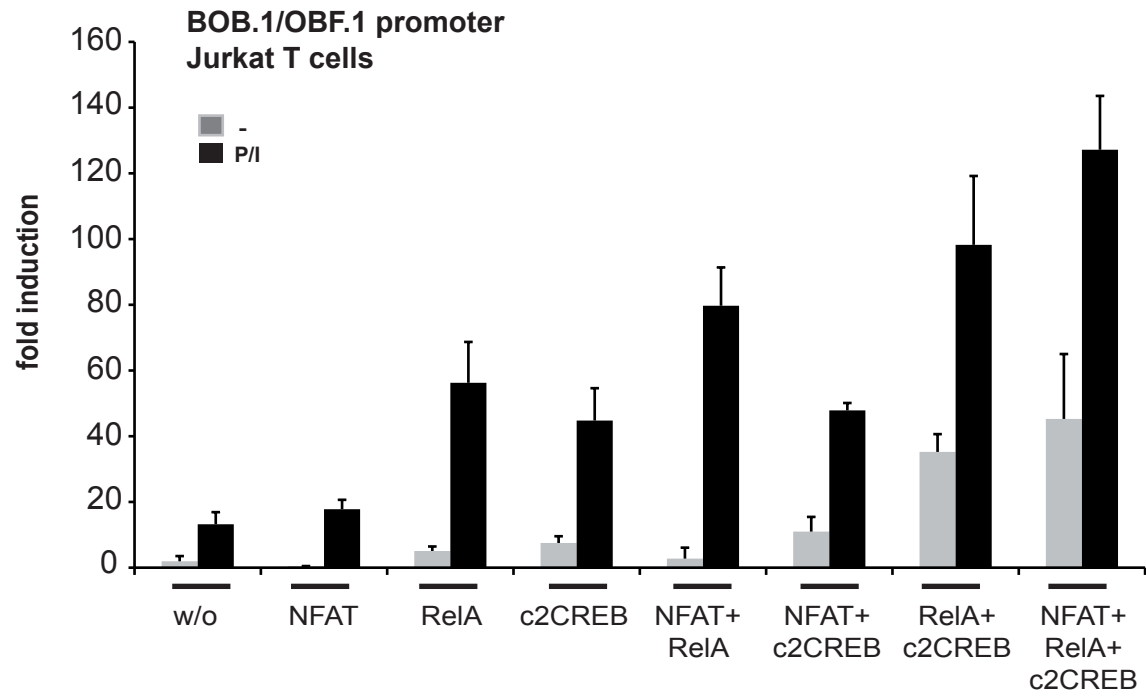

Supplementary Figure 5

**A) CD4<sup>+</sup> T cells  
(wt versus NFATc1/NFATc2 DKO)**

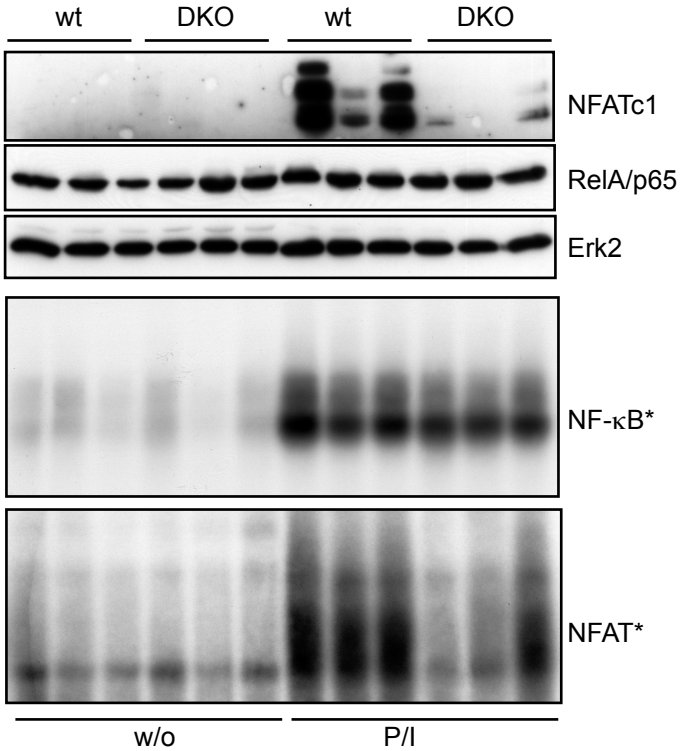

**B) CD4<sup>+</sup> T cells  
(wt versus TNFR1/p65 DKO)**

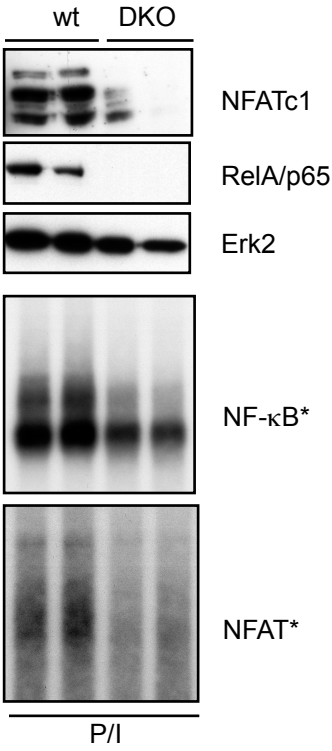

**C) Jurkat T cells**

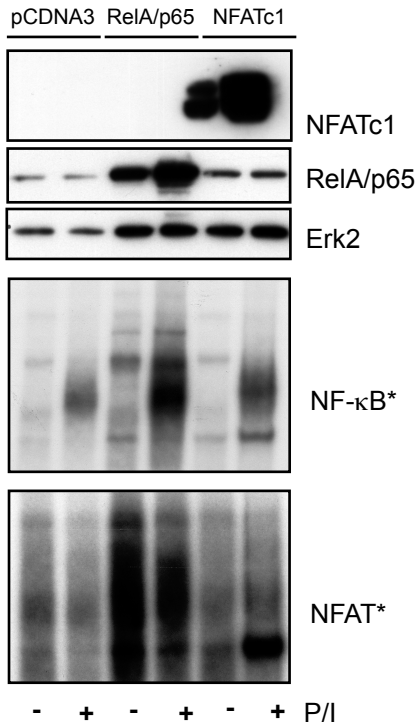

| <b>probe</b>                             | <b>forward</b>                                         | <b>reverse</b>                                          |
|------------------------------------------|--------------------------------------------------------|---------------------------------------------------------|
| NF-κB                                    | gcggGCCTGGGAAAGTCCCCTCAACT                             | gcggAGTTGAGGGGACTTTCCAGGC                               |
| NF-κB-Mut                                | gcggGCCTG <b>t</b> AAAGTCCCCTCAACT                     | gcggAGTTGAGGGGACTTT <b>aa</b> CAGGC                     |
| NFAT-IL2 prom                            | ggcgACCCCAAAGAGGAAAATTTGTTTCATACAG                     | ggcgCTGTATGAAACAAATTT <b>CT</b> CTTTGGGGT               |
| NFAT-IL2 prom-Mut                        | ggcgACCCCAAAG <b>At</b> AAAATTTGTTTCATACAG             | ggcgCTGTATGAAACAAATTT <b>Taa</b> CTTTGGGGT              |
| NFAT-Bob prom                            | ggcgGGCGGTGTTGCTGAAGAAAAAAAAAGTACA                     | ggcgGTACTTTTTTTTTCTTCAGCAACACCGCC                       |
| NFAT-Bob prom-Mut1                       | ggcgGGCGGTGTTGCTGA <b>At</b> AAAAAAAAAGTACA            | ggcgGTACTTTTTTTTT <b>Ta</b> TCAGCAACACCGCC              |
| NFAT-Bob prom-Mut2                       | ggcgGGCGGTGTTGCTGAAGAAAAAAAA <b>At</b> TACA            | ggcgGT <b>Aa</b> TTTTTTTTCTTCAGCAACACCGCC               |
| composite NFAT/NF-κB-Bob.1 prom          | ggcgGAGGGCAG <b>GG</b> TGTT <b>CT</b> CCCATGGTG        | ggcgCACCATGGGAG <b>GG</b> AAAC <b>ACT</b> GCCCTC        |
| composite NFAT/NF-κB-Bob.1 prom-Mut1     | ggcgGAGGGC <b>At</b> tTGTT <b>CT</b> CCCATGGTG         | ggcgCACCATGGGAGGAAAC <b>Aa</b> TGCCCTC                  |
| composite NFAT/NF-κB-Bob.1 prom-Mut2     | ggcgGAGGGCAG <b>GG</b> TGTT <b>Taa</b> TCCCATGGTG      | ggcgCACCATGGG <b>At</b> tAAAC <b>ACT</b> GCCCTC         |
| consecutive NFAT/NF-κB - Bob.1 prom      | ggcgAGTGACCCTGG <b>GA</b> ATCGCATTT <b>CCC</b> GTCGAGC | ggcgGCTCGACGG <b>GA</b> AATGCGATT <b>CCC</b> AGGGGTCACT |
| consecutive NFAT/NF-κB - Bob.1 prom-Mut1 | ggcgAGTGACCCTG <b>t</b> tAATCGCATTT <b>CCC</b> GTCGAGC | ggcgGCTCGACGG <b>GA</b> AATGCGATT <b>aa</b> CAGGGGTCACT |
| consecutive NFAT/NF-κB - Bob.1 prom-Mut2 | ggcgAGTGACCCTGG <b>GA</b> ATCGCATTT <b>aa</b> CGTCGAGC | ggcgGCTCGACG <b>t</b> tAAATGCGATT <b>CCC</b> AGGGGTCACT |

Supplementary Table 1

| <b>gene</b>                         | <b>forward</b>         | <b>reverse</b>           |
|-------------------------------------|------------------------|--------------------------|
| murine <i>Bob.1/Obf.1 (Pou2af1)</i> | catgctctggcaaaaaatcc   | actcgaacaccctggtatgg     |
| murine <i>Oct2 (Pou2f2)</i>         | ggcccaactcatgctgac     | agctggaggagttgctgatg     |
| murine <i>Rpl13</i>                 | cctgctgctctcaagttgt    | ggtacttccaccgacctc       |
| murine <i>HPRT</i>                  | cctaagatgagcgcaagttgaa | ccacaggactagaacacctgctaa |
| human <i>BOB.1/OBF.1 (POU2AF1)</i>  | cacagctccggagcaagcc    | ccttccacagagagagtgtgg    |
| human <i>OCT2 (POU2F2)</i>          | atggagaaggaagtgatccg   | ttgatgcgtttctccttctg     |
| human <i>RPL13</i>                  | cggaccgtgaggtat        | caccatccgcttttcttctgc    |
| Human <i>HPRT</i>                   | gaccagtcaacaggggacat   | cttgcgaccttgaccatctt     |

Supplementary Table 2

| <b>ChIP primer</b>            | <b>forward</b>             | <b>reverse</b>            |
|-------------------------------|----------------------------|---------------------------|
| NFAT/κB BOB.1 promoter        | gcaacaccgagaacgaggag       | catacagttccacactatcag     |
| NFAT BOB.1 promoter           | ggcctcctgtgctgatggtgg      | ggcccgaattcccgtgagag      |
| Bob.1 promoter control region | cactggagaatgaaggatccagacct | ctcgtaggctccatccaagtgacct |

Supplementary Table 3

| <b>in vitro mutagenesis primer</b>    | <b>forward</b>                                           | <b>reverse</b>                                            |
|---------------------------------------|----------------------------------------------------------|-----------------------------------------------------------|
| <b>ivM NFAT site</b>                  | gcggtg ttgctgaata<br>aaaaaaatta cagctctgcc tgagg         | cctca ggcagagctg taattttttt<br>tattcagcaa caccgc          |
| <b>ivM consecutive NFAT/NFkB site</b> | gaatagt gaccctggt<br>aatcgcatTT aacgTcgagc<br>Tgggacc    | ggtccca gctcgacgTt<br>aaatgcgatt aacaggggTc<br>actattc    |
| <b>ivM composite NFAT/NFkB site</b>   | ggct tgaagagagg gcatttgTtt<br>aatcccatgg tgagaatagt gacc | ggTc actatttctca ccatgggatt<br>aaacaaatgc cctctcttca agcc |
| <b>ivM CREB site</b>                  | c tgaggtagga ggatgtgatt<br>gctcgcccc tctcagc             | gctgaga ggggccgagc<br>aatcacatcc tctacctca g              |

Supplementary Table 4

## LEGENDS TO SUPPLEMENTARY FIGURES AND TABLES

Supplementary Figure 1: **CsA, FK506 and Bay-11 affect the binding of NFAT and NF- $\kappa$ B to DNA.** A) Primary murine CD4<sup>+</sup> T cells were treated as indicated. After 18 h of stimulation cells were harvested, protein extracts were prepared and analyzed by EMSA for their ability to bind to DNA bearing a consensus NF- $\kappa$ B or NFAT motif.

Supplementary Figure 2. **Consensus NFAT and NF- $\kappa$ B sites compete against complex formation observed on newly identified NFAT/NF- $\kappa$ B site of the BOB.1/OF.1 promoter.** In order to investigate the potential binding of NFAT and NF- $\kappa$ B factors to the newly identified NFAT/NF- $\kappa$ B site of the BOB.1/OBF.1 promoter observed in experiments depicted in Figure 2 competition experiments were performed using 10 or 100 fold molar excess of non-labeled consensus NFAT or NF- $\kappa$ B sites together with labeled sites representing sequences of the BOB.1/OBF.1 promoter and whole protein extracts of unstimulated or with P/I treated CD4<sup>+</sup> T cells. In addition, to prove the specificity of antibody binding observed in supershift experiments (Figure 2) control experiments were performed using murine IgG antibodies (mIgG) or normal rabbit serum (NRS).

Supplementary Figure 3. **The BOB.1/OBF.1 promoter spanning 500 bp is necessary and sufficient for full inducible activity in T cells.** A) Schematic representation of the BOB.1/OBF.1 promoter. The positions of the analyzed *cis*-elements as well as of the promoter fragments used in reporter assays are indicated. B and C) Jurkat T cells were transiently transfected with the empty vector (ev) or with reporter constructs bearing either the 1500 bp or the 500 bp BOB.1/OBF.1 promoter construct or a deletion mutant of the longer version where the first 500 bp are missing (1500 $\Delta$ 500 bp). Additionally, Jurkat cells were transfected with an empty vector containing a TATA box (ev + TATA) or with a vector, where the 1500 $\Delta$ 500 bp BOB.1/OBF.1 promoter construct was cloned in front of a TATA-box (1500 $\Delta$ 500 bp +TATA). The relative luciferase activity (B) or the fold induction (C) of different promoter fragments was determined without or after stimulation of cells with P/I, were in the second case the fold induction was determined relative to the luciferase activity of the empty vector without stimulation that was set to one. Shown are the mean values  $\pm$  s.d. of four independently performed experiments.



Supplementary Figure 4. **A constitutive active version of CREB transactivates together with NFAT and NF- $\kappa$ B the BOB.1/OBF.1 promoter.** Jurkat T cells were transiently transfected with the 1500 bp BOB.1/OBF.1 promoter construct either alone or together with expression vectors for NFATc1, RelA/p65 or the constitutive active version of CREB (c2CREB) or with combination of those as indicated. Transfected cells were either left untreated or stimulated with P/I. Next day the cells were harvested to determine the relative luciferase activity. The relative luciferase activity resulting from the transfection of the 1500 bp promoter construct alone without induction was set to one. The fold induction relative to this value was calculated and is depicted. Shown are the mean values  $\pm$  s.d. of three independently performed experiments.

Supplementary Figure 5. **Modulation of NF- $\kappa$ B activity influences the expression and consequently the binding capacity of NFAT.** Murine wildtype CD4<sup>+</sup> T cells, CD4<sup>+</sup> T cells deficient for NFATc1 and NFATc2 (DKO in (A)) or deficient in TNFRI and p65 (DKO in (B)) were analyzed for protein expression of NFATc1 and RelA/p65 in Western Blots. The analyses of ERK2 protein expression served as loading control. The NFAT and NF- $\kappa$ B binding activity was assayed in EMSA experiments using labeled NFAT and NF- $\kappa$ B consensus sites as probes. C) Jurkat cells were transiently transfected with RelA/p65 or NFATc1 expression vectors and subsequently analyzed as described in A) and B).

Supplementary Table 1. Sequences of oligomers bearing different potential as well established transcription factor binding site used after annealing as labeled dsDNA probes in EMSA.

Supplementary Table 2. Sequences of primers used for the analyses of mRNA expression of human as well as murine *BOB.1/OBF.1* and *OCT2* as well as the house-keeping gene *RPL13* by quantitative RT-PCR.

Supplementary Table 3. Sequences of primers used for the analyses of enriched genomic DNA fragments after chromatin immunoprecipitation.

Supplementary Table 4. Sequences of primers used for in vitro mutagenesis of the 1500 bp BOB.1/OBF.1 promoter.
